# Supplementary material for: A novel graphene sheet-wrapped Co2(OH)3Cl composite as a long-life anode material for lithium ion batteries
Source: Royal Society of Chemistry journal article supplement (doi:10.1039/c4ta03857f), 2014-01-01
Supplement: c4ta03857f1.pdf [file c4ta03857f1.pdf]

## Electronic Supplementary Information for

### A novel graphene sheet-wrapped $\text{Co}_2(\text{OH})_3\text{Cl}$ composite as a long-life anode material for lithium ion batteries

*Jingjing Ma,<sup>a</sup> Tao Yuan,<sup>ab</sup> Yu-Shi He,<sup>\*a</sup> Jiulin Wang,<sup>a</sup> Weimin Zhang,<sup>ab</sup> Dezhi Yang,<sup>a</sup>*

*Xiao-Zhen Liao,<sup>a</sup> and Zi-Feng Ma<sup>\*ac</sup>*

<sup>a</sup> Institute of Electrochemical and Energy Technology, Department of Chemical Engineering, Shanghai Jiao Tong University, Shanghai, 200240, China; Tel: +86-21-54742827; Fax: +86-21-54741297; E-mail: [ys-he@sjtu.edu.cn](mailto:ys-he@sjtu.edu.cn), [zfma@sjtu.edu.cn](mailto:zfma@sjtu.edu.cn)

<sup>b</sup> Sinopoly Battery Research Center, Shanghai 200241, China.

<sup>c</sup> Department of Chemical and Biological Engineering, Zhejiang University, Hangzhou, 310027, China

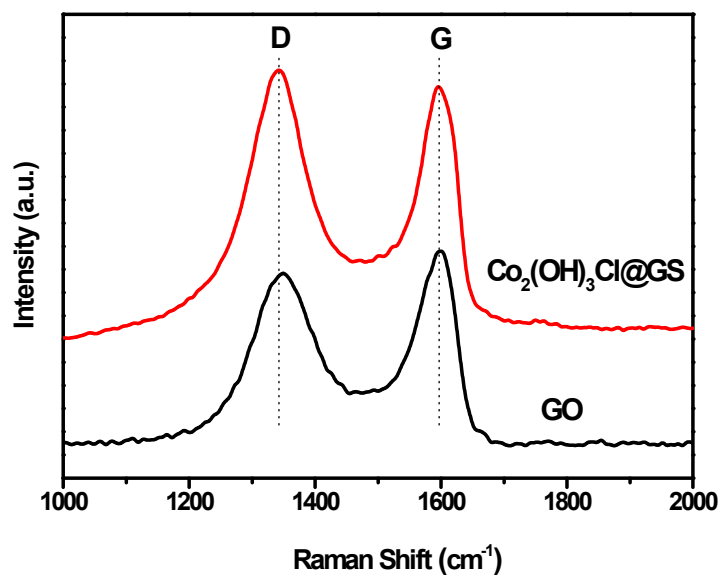

Fig. S1. Raman spectra for the  $\text{Co}_2(\text{OH})_3\text{Cl}@GS$  and GO

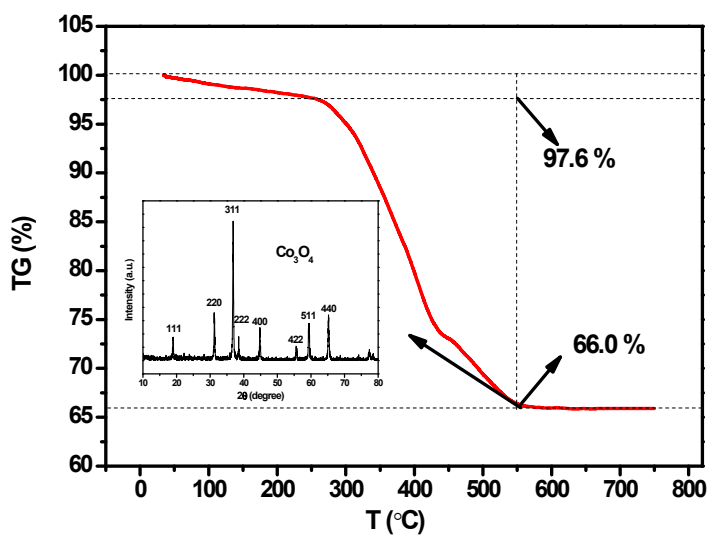

Fig. S2. TGA curve of the  $\text{Co}_2(\text{OH})_3\text{Cl}@GS$  composite in air atmosphere. The inset is the XRD pattern of the calcination product of  $\text{Co}_2(\text{OH})_3\text{Cl}$  at 550 °C.

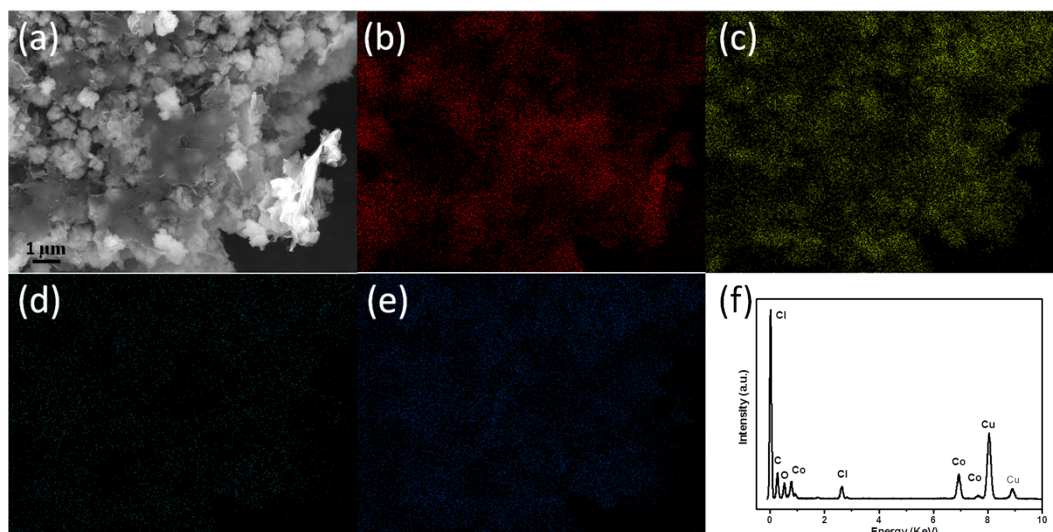

Fig. S3. Elemental mapping images of the  $\text{Co}_2(\text{OH})_3\text{Cl}@GS$  composite. (a) Typical SEM image with corresponding EDS mapping images over a relatively large area (about  $10 \mu\text{m} \times 14 \mu\text{m}$ ) for the elements (b) carbon, (c) oxygen, (d) cobalt and (e) chloride, and (f) EDS spectrum.

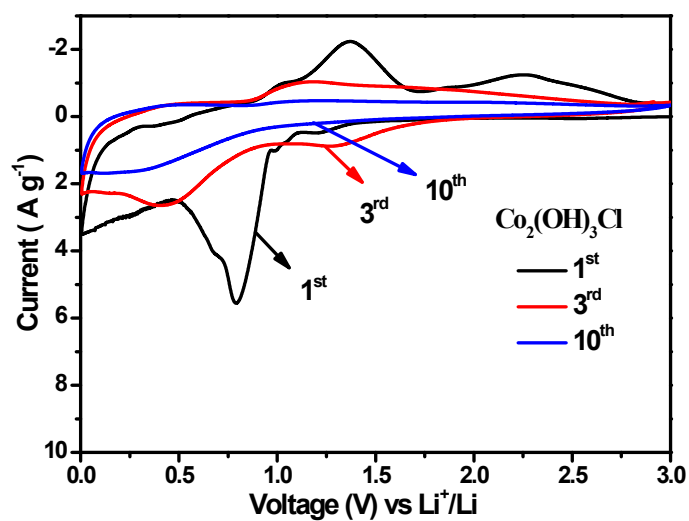

Fig. S4. CV curves of the bare  $\text{Co}_2(\text{OH})_3\text{Cl}$  in the potential range of 0.005–3 V at a scan rate of  $0.1 \text{ mV s}^{-1}$

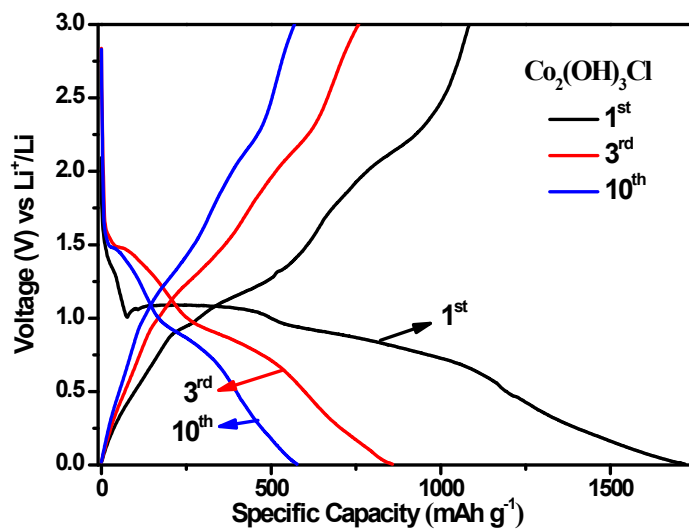

Fig. S5. Charge–discharge curves of the bare  $\text{Co}_2(\text{OH})_3\text{Cl}$  composite at a current density of 50  $\text{mA g}^{-1}$ .

Table S1 Comparison of the rate and cycling capability of bare  $\text{Co}_2(\text{OH})_3\text{Cl}$  and  $\text{Co}_2(\text{OH})_3\text{Cl}@GS$  composite synthesized in this work with those of  $\text{Co}(\text{OH})_2$  and  $\text{Co}(\text{OH})_2$ -based composites reported in the literatures

| Samples                                                | Initial reversible capacity ( $\text{mAh g}^{-1}$ ) | Initial Coulombic efficiency (%) | Capacity | Current densities ( $\text{mA g}^{-1}$ ) | corresponding capacity ( $\text{mAh g}^{-1}$ ) | Capacity retention (%) | Ref.      |
|--------------------------------------------------------|-----------------------------------------------------|----------------------------------|----------|------------------------------------------|------------------------------------------------|------------------------|-----------|
| Bare $\text{Co}_2(\text{OH})_3\text{Cl}$               | 1083                                                | 63                               | Rate     | 50                                       | 570                                            | 52.6                   | This work |
|                                                        |                                                     |                                  |          | 100                                      | 473                                            | 43.7                   |           |
|                                                        |                                                     |                                  |          | 200                                      | 416                                            | 38.4                   |           |
|                                                        |                                                     |                                  |          | 400                                      | 278                                            | 25.7                   |           |
|                                                        |                                                     |                                  |          | 800                                      | 192                                            | 17.8                   |           |
|                                                        |                                                     |                                  | Cycling  | 200                                      | 407 after 50 cycles                            | 37.6                   |           |
| Pure $\text{Co}(\text{OH})_2$                          | 670                                                 | 43                               | Cycling  | 200                                      | 400 after 30 cycles                            | 58.0                   | [S1]      |
| $\text{Co}(\text{OH})_2$                               | 700                                                 | 77                               | Rate     | 58                                       | 480                                            | 68.6                   | [S2]      |
|                                                        |                                                     |                                  |          | 580                                      | 90                                             | 12.9                   |           |
|                                                        |                                                     |                                  | Cycling  | 1160                                     | 30                                             | 4.3                    |           |
| Bare $\text{Co}(\text{OH})_2$                          | 581                                                 | 63                               | Rate     | 58                                       | 500                                            | 86                     | [S3]      |
|                                                        |                                                     |                                  |          | 290                                      | 100                                            | 17.2                   |           |
|                                                        |                                                     |                                  |          | 580                                      | 30                                             | 5.2                    |           |
|                                                        |                                                     |                                  | Cycling  | 1160                                     | 10                                             | 1.7                    |           |
| $\text{Co}_2(\text{OH})_3\text{Cl}@GS$                 | 1081                                                | 66                               | Rate     | 58                                       | 98 after 40 cycles                             | 16.9                   | This work |
|                                                        |                                                     |                                  |          | 50                                       | 840                                            | 77.7                   |           |
|                                                        |                                                     |                                  |          | 100                                      | 767                                            | 71.0                   |           |
|                                                        |                                                     |                                  |          | 200                                      | 685                                            | 63.4                   |           |
|                                                        |                                                     |                                  |          | 400                                      | 601                                            | 55.6                   |           |
|                                                        |                                                     |                                  | Cycling  | 800                                      | 496                                            | 45.9                   |           |
|                                                        |                                                     |                                  | 1600     | 397                                      | 36.7                                           |                        |           |
| $\text{Co}(\text{OH})_2-GS$                            | 1120                                                | 70                               | Cycling  | 200                                      | 753 after 50 cycles                            | 69.7                   | [S1]      |
| Graphene coated $\text{Co}(\text{OH})_2$               | 786                                                 | 68                               | Rate     | 200                                      | 414 after 300 cycles                           | 38.3                   | [S2]      |
|                                                        |                                                     |                                  |          | 1600                                     | 910 after 30 cycles                            | 82.0                   |           |
|                                                        |                                                     |                                  | Cycling  | 58                                       | 706 after 50 cycles                            | 89.8                   |           |
| $\text{Co}(\text{OH})_2/\text{Co}_3\text{O}_4$ hybrids | 1066                                                | 73                               | Rate     | 58                                       | 1200                                           | 112.5                  | [S3]      |
|                                                        |                                                     |                                  |          | 290                                      | 800                                            | 75.0                   |           |
|                                                        |                                                     |                                  |          | 580                                      | 440                                            | 41.3                   |           |
|                                                        |                                                     |                                  |          | 1160                                     | 200                                            | 18.8                   |           |
|                                                        |                                                     |                                  | Cycling  | 58                                       | 1160 after 40 cycles                           | 108.8                  |           |

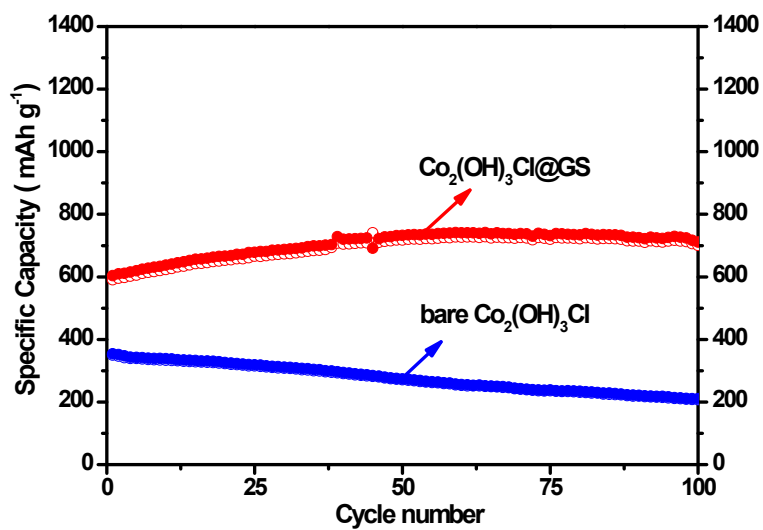

Fig. S6. Reversible Li extraction capacity of the Co<sub>2</sub>(OH)<sub>3</sub>Cl@GS and bare Co<sub>2</sub>(OH)<sub>3</sub>Cl at a charge/discharge current density of 1600 mA g<sup>-1</sup> at 55 °C. All cells were cycled at a current density of 50 mA g<sup>-1</sup> for the initial two cycles before each test. Solid and hollow point symbols represent lithium insertion and extraction, respectively.

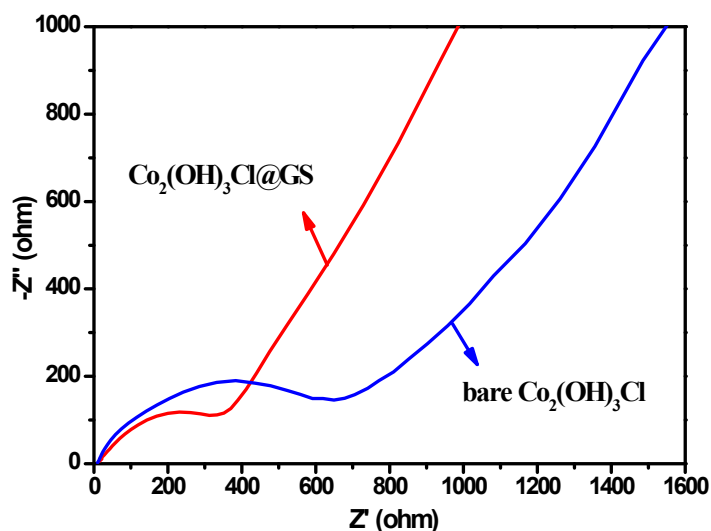

Fig. S7. Nyquist plots of the bare  $\text{Co}_2(\text{OH})_3\text{Cl}$  and  $\text{Co}_2(\text{OH})_3\text{Cl}@GS$  electrodes after 50 cycles at a current density of  $200 \text{ mA g}^{-1}$  under a three-electrode system. The electrolyte contained  $1 \text{ M LiPF}_6$  in dimethyl carbonate (DMC) and ethylene carbonate (EC) mixed solvent with a v/v ratio of 1:1. The cells were assembled in an argon-filled glove box. Charge–discharge cycles of the three-electrode cells were carried out between 0.005 and 3 V vs.  $\text{Li/Li}^+$  at room temperature, using the Autolab PGSTAT302N (Metrohm) model electrochemical workstation under constant current conditions. All measurements were conducted in the delithiated state.

## References

- [S1] Y.-S. He, D.-W. Bai, X. Yang, J. Chen, X.-Z. Liao and Z.-F. Ma, *Electrochem. Commun.*, 2010, **12**, 570-573.
- [S2] X.-l. Huang, J. Chai, T. Jiang, Y.-J. Wei, G. Chen, W.-q. Liu, D. Han, L. Niu, L. Wang and X.-b. Zhang, *J. Mater. Chem.*, 2012, **22**, 3404-3410.
- [S3] X.-l. Huang, X. Zhao, Z.-l. Wang, L.-m. Wang and X.-b. Zhang, *J. Mater. Chem.*, 2012, **22**, 3764-3769.
